1 Isolated from input: Evidence of default mode network support for perceptually-  
2 decoupled and conceptually-guided cognition

3

4 Abbreviated Title – Insulated from input

5

6 Charlotte Murphy<sup>1</sup>, Elizabeth Jefferies<sup>1</sup>, Shirley-Ann Rueschemeyer<sup>1</sup>, Mladen  
7 Sormaz<sup>1</sup>, Hao-ting Wang<sup>1</sup>, Daniel S. Margulies<sup>2</sup> and Jonathan Smallwood<sup>1</sup>

8

9 <sup>1</sup>Department of Psychology / York Neuroimaging Centre, University of York.

10 <sup>2</sup> Max Planck Research Group for Neuroanatomy & Connectivity, Max Planck  
11 Institute for Human Cognitive and Brain Sciences, Leipzig.

12

13 Address for correspondence:

14 Charlotte Murphy

15 Department of Psychology / York Neuroimaging Centre, University of York.

16 Email: [charlotte.murphy@york.ac.uk](mailto:charlotte.murphy@york.ac.uk)

17 Tel +44 (0)1904 323190

18

19

20

21 Abstract

22 The default mode network supports a variety of mental operations such as  
23 semantic processing, episodic memory retrieval, mental time travel and mind-  
24 wandering, yet the commonalities between these functions remains unclear. One  
25 possibility is that this system supports cognition that is independent of the  
26 immediate environment; alternatively or additionally, it might support higher-  
27 order conceptual representations that draw together multiple features. We tested  
28 these accounts using a novel paradigm that separately manipulated the  
29 availability of perceptual information to guide decision-making and the  
30 representational complexity of this information. Using task based imaging we  
31 established regions that respond when cognition combines both stimulus  
32 independence with multi-modal information. These included left and right  
33 angular gyri and the left middle temporal gyrus. Although these sites were within  
34 the default mode network, they showed a stronger response to demanding  
35 memory judgements than to an easier perceptual task, contrary to the view that  
36 they support automatic aspects of cognition. In a subsequent analysis, we showed  
37 that these regions were located at the extreme end of a macroscale gradient, which  
38 describes gradual transitions from sensorimotor to transmodal cortex. This shift  
39 in the focus of neural activity towards transmodal, default mode, regions might  
40 reflect a process of isolation from specific sensory inputs that enables  
41 conceptually rich cognitive states to be generated in the absence of input.

42

43 Key words: transmodal cortex, default mode network, semantic, conceptual  
44 processing, stimulus independence.

45 Highlights

- 46 • Brain regions supporting meaning overlap with stimulus independence.
- 47 • Bilateral angular gyri and left MTG respond strongly to both features of
- 48 cognition.
- 49 • These patterns reflect a shift in activity towards regions of transmodal
- 50 cortex.
- 51 • Complex memory representations may emerge in cortical areas distant
- 52 from input.

## 53 1. Introduction

54           Although initial studies characterized the default mode network (DMN) as  
55 “task negative”, this network actively supports aspects of cognition (Spreng,  
56 2012), including semantic processing (Binder, Desai, Graves, & Conant, 2009;  
57 Krieger-Redwood et al., 2016), episodic recollection (Rugg & Vilberg, 2013),  
58 working memory (Konishi, McLaren, Engen, & Smallwood, 2015; Spreng et al.,  
59 2014; Vatansever, Menon, Manktelow, Sahakian, & Stamatakis, 2015),  
60 autobiographical planning (Spreng, Gerlach, Turner, & Schacter, 2015; Spreng,  
61 Stevens, Chamberlain, Gilmore, & Schacter, 2010), self-generation of emotion  
62 (Engen, Kanske, & Singer, 2017) and imagining the future or the past (Schacter &  
63 Addis, 2007). Although we lack an over-arching account of the functions of the  
64 DMN, many of these situations involve memory retrieval – i.e., a requirement to  
65 focus cognition on previously-encoded knowledge, as opposed to information in  
66 the external environment. In line with this account, many regions within or allied  
67 to the DMN are considered to be heteromodal ‘hubs’ for memory-related  
68 processes, including the posterior cingulate cortex (Leech, Braga, & Sharp, 2012;  
69 Leech & Sharp, 2014), angular gyrus (Bonnici, Richter, Yazar, & Simons, 2016;  
70 Seghier, 2013), hippocampus (Moscovitch, Cabeza, Winocur, & Nadel, 2016) and  
71 anterior temporal lobes (Visser, Jefferies, & Lambon Ralph, 2010). In addition,  
72 cognitive states that activate the DMN tend to involve meaningful content that has  
73 personal relevance (Gusnard, Akbudak, Shulman, & Raichle, 2001).

74           The current study was motivated by the hypothesis that there might be  
75 common neurocognitive processes underpinning perceptually-decoupled and  
76 conceptually-guided cognition in the DMN. During states of episodic recollection,  
77 we recreate past experiences that involve places, objects and people not currently  
78 present in the environment. Consequently, memory retrieval might necessitate a  
79 process of decoupling from sensorimotor systems, allowing cognition to be  
80 generated internally in a way that diverges from what is going on around us  
81 (Smallwood, 2013). These perceptually-decoupled states might be easier in brain  
82 regions whose neural computations are functionally independent, or distant, from  
83 systems important for perceiving and acting. This is consistent with the  
84 observation that the distributed regions of the DMN are maximally distant from  
85 primary visual and motor cortex, both in terms of their distinct patterns of

86 functional connectivity and their positions along the cortical surface (Margulies et  
87 al., 2016).

88 In addition, DMN regions might support higher-order representations with  
89 predictive value across multiple situations and modalities, which integrate  
90 features from diverse sensorimotor regions. Contemporary accounts of semantic  
91 representation (Lambon Ralph, Jefferies, Patterson, & Rogers, 2017) envisage an  
92 interaction between unimodal brain regions that support knowledge about  
93 specific features (e.g., knowledge that BANANAS are YELLOW and CURVED in visual  
94 cortex) and heteromodal regions within or allied to the DMN, which extract deeper  
95 similarity structures across these domains (i.e., allow us to understand that  
96 BANANA and KIWI are conceptually related, despite salient differences in colour,  
97 shape etc.). This view is also consistent with the observation that DMN lies at the  
98 extreme end of a gradient from heteromodal to unimodal cortex (Margulies et al.,  
99 2016), since increasingly abstract and complex representations might be formed  
100 at greater distances along the gradient, where the influence of specific features  
101 linked to stimuli in the immediate environment is reduced (Buckner & Krienen,  
102 2013; Margulies et al., 2016; Mesulam, 1998). Within the DMN, angular gyrus  
103 (Binder & Desai, 2011; Bonner et al., 2013) and anterior temporal cortex (Lambon  
104 Ralph et al., 2017; Patterson et al., 2007) are both implicated in heteromodal  
105 semantic processing. However, their roles remain controversial since other  
106 regions such as left inferior frontal gyrus and posterior aspects of the temporal  
107 lobe frequently show stronger task-induced activation in fMRI. Angular gyrus, in  
108 particular, typically shows a pattern of task-induced deactivation, which is greater  
109 for harder judgements in both semantic and non-semantic tasks (Humphreys et  
110 al., 2015; Humphreys & Lambon Ralph, 2015). In addition, despite commonalities  
111 in the intrinsic connectivity of these regions, differences in semantic content have  
112 been proposed although not broadly accepted (Jackson, Hoffman, Pobric &  
113 Lambon Ralph, 2016): the anterior temporal lobes might support object  
114 identification, while angular gyrus is potentially more sensitive to thematic  
115 associations (Davey et al., 2015; Schwartz et al., 2011).

116 We developed a novel paradigm to identify brain regions important for  
117 stimulus independence, more complex memory representations and the  
118 combination of both features in cognition. Our experiment builds on prior work

119 by Konishi and colleagues (Konishi et al., 2015). In their study, participants kept  
120 track of the location of pairs of simple shapes (triangles, squares and circles)  
121 presented either side of fixation. When probed with one shape from a prior trial  
122 and asked which side of the screen it was presented on, activity increased in  
123 regions including those within the DMN. The current study extended this  
124 paradigm by varying the complexity of the information to be encoded and  
125 retrieved. In one condition participants keep track of the location of pairs of  
126 stimuli that vary on a single feature (colored patches), in a second they keep track  
127 of stimuli that vary in a more complex manner (pairs of familiar real world objects  
128 such as dogs or cars). Objects place greater demands on memory than do colours  
129 because they are distinguished based on a greater number of features. This  
130 allowed us to contrast higher and lower levels of representational complexity in  
131 the perceptual representations and memories that would be probed. We also  
132 manipulated whether these decisions were made when the relevant information  
133 is on the screen (0 – back) or when only the identity of the target upon which the  
134 decision is based is present (1 – back). In the latter case the relevant spatial  
135 information must be retrieved from memory, a manipulation that allowed us to  
136 explore the property of stimulus independence in cognition. This paradigm is  
137 presented schematically in Figure 1.

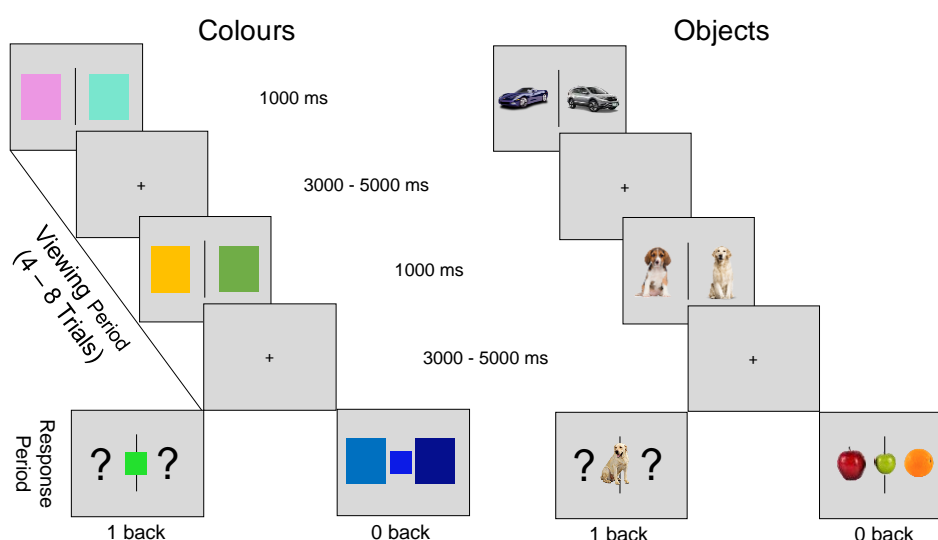

138

139 **Figure 1.** *Experimental design.* The four different judgments that participants  
140 made in this experiment.

141

142 We used this paradigm in a functional magnetic resonance imaging (fMRI)

143 experiment to localize the brain regions that support the properties of stimulus  
144 independence and representational complexity. Our aim was to establish whether  
145 regions sensitive to perceptual decoupling and conceptual retrieval fall within the  
146 DMN, and whether these effects were located in overlapping or distinct regions.  
147 We identified regions of cortex that respond: (i) to stimuli with a rich multi-modal  
148 structure by comparing the response of objects to colors, (ii) when decision  
149 making has a higher reliance on memory by comparing decisions that are made in  
150 the 1-back condition with those made in the 0-back conditions, and (iii) to  
151 conditions that require a combination of both elements of cognition. We tested  
152 these hypotheses using both standard whole brain univariate analyses, as well as  
153 characterizing neural activity in each condition in terms of its position on the  
154 macroscale gradient from unimodal to heteromodal cortex described by Margulies  
155 et al. (2016).

156 If regions in the DMN are activated when spatial decisions are guided by  
157 information from memory, this would support a role in stimulus independent  
158 decision making. Alternatively, if DMN regions respond to decisions made  
159 regarding objects rather than colours, this would reflect a role in the processing of  
160 information with a high degree of representational complexity. Finally, if DMN  
161 regions show the strongest response when spatial decisions are made based on  
162 objects from memory, these regions would support more complex stimulus  
163 independent representational states. This latter pattern would be consistent with  
164 the hypothesis that decoupling from perceptual input enables cognition to  
165 represent information that diverges from what is going on around us (Smallwood,  
166 2013). Moreover, if this processing emerges in regions located towards the  
167 transmodal end of the principle gradient, this would support the hypothesis that  
168 the “distance” from systems important for perceiving and acting, provides a  
169 cortical mechanism that underpins the processing of complex representations  
170 derived from memory (Lambon Ralph et al., 2016; Margulies et al., 2016).

171

## 172 2. Material and Methods

173

### 174 2.1 Participants

175 Thirty right-handed native British-speaking participants with normal or

176 corrected-to-normal vision were recruited from the University of York (16 female;  
177 mean age 22.68, range 18-34 years). One participant's data was excluded due to  
178 excessive motion artefacts, leaving twenty-nine subjects in the final analysis for  
179 (15 female; mean age 22.57, range 18-24 years). In a subsequent analysis we used  
180 a set of 60 participants' resting state data, including the same individuals who  
181 performed the task (34 female; mean age 20.32, range 18-29 years). Both studies  
182 were approved by the York Neuroimaging Centre (YNIC) Ethics Committee.  
183 Participant's provided informed consent prior to the start of the experimental  
184 session.

185

## 186 2.2 Stimuli

187 The task paradigm had four conditions: (A) Object 0-back, (B) Object 1-  
188 back, (C) Colour 0-back and (D) Colour 1-back using a block design. In all  
189 conditions, pairs of items were presented separated by a central line. In the colour  
190 conditions, these were different coloured squares, while in the object conditions,  
191 these were familiar and meaningful objects, taken from the same semantic  
192 category (i.e., different types of cars, fruit, dogs; see Figure 1). Items were  
193 presented once with no repetition. The contrast between object and colour  
194 conditions allowed us to investigate regions that are important for the retrieval of  
195 conceptual information. The colour patches only varied on one feature (their  
196 colour), while the objects were meaningful multi-featural concepts. In addition,  
197 the contrast of 0-back and 1-back conditions allowed us to investigate the effect of  
198 stimulus-independent processing (1 back > 0 back).

199

## 200 2.3 Procedure

201 In the scanner, participants completed a total of four functional runs  
202 (average run time 8 min 32 s). Within each run, there were two blocks related to  
203 each of the 4 conditions (Object 1-back; Object 0-back; Colour 1-back; Colour 0-  
204 back). Each block began with written instructions stating the task type (0-back or  
205 1-back). Blocks consisted of observing pairs of items (1000 ms); each pair was  
206 separated by a jittered inter-stimulus interval (ISI; 3000-5000 ms) in which a  
207 fixation cross was presented. At random intervals (4-8 trials), a third item was  
208 presented in the centre of the screen and participants were asked to indicate the



209 location of one of the pair (left or right) that was most similar to this probe (see  
210 Figure 1). This paradigm also required participants to match items that were  
211 present and compared this with items in memory. In the 0-back catch-trials  
212 participants had to decide which stimulus (left or right of the screen) was most  
213 similar to this centrally-presented probe (i.e., all items were present on the  
214 screen). In the 1-back catch-trials, participants had to decide which stimulus (left  
215 or right of the screen) had been most similar to this centrally-presented probe on  
216 the previous trial (i.e., the critical stimulus was absent). Blocks consisted of 5  
217 probes in total and lasted on average 64 s.

218

#### 219 2.4 MRI Acquisition

220 Data for both experiments were acquired using a GE 3 T HD Excite MRI  
221 scanner at the YNIC. A Magnex head-dedicated gradient insert coil was used in  
222 conjunction with a birdcage, radio-frequency insert coil tuned to 127.4 MHz. A  
223 gradient-echo EPI sequence was used to collect data from 38 bottom-up axial  
224 slices aligned with the temporal lobe (TR = 2s, TE = 18ms, FOV = 192x192mm,  
225 matrix size = 64x64, slice thickness = 3mm, slice-gap = 1mm, flip-angle = 90°).  
226 Voxel size was 3x3x3mm. Functional images were co-registered onto a T1-  
227 weighted anatomical image from each participant (TR = 7.8s, TE = 3ms, FOV =  
228 290x290mm, matrix size = 256x256mm, voxel size = 1.13x1.13x1mm) using  
229 linear registration.

230

#### 231 2.5 Pre-processing

232 All imaging data were pre-processed using a standard pipeline and  
233 analysed via FMRIB Software Library (FSL Version 6.0). Images were skull-  
234 stripped using a brain extraction tool [BET, (Smith, 2002)]. The first five volumes  
235 (10s) of each scan were removed to minimize the effects of magnetic saturation,  
236 and slice-timing correction with Fourier space time-series phase-shifting was  
237 applied. Motion correction (MCFLIRT, (Jenkinson, Bannister, Brady, & Smith,  
238 2002)) was followed by temporal high-pass filtering (cut-off = 0.01Hz). Individual  
239 participant data was registered to their high-resolution T1-anatomical image, and

240 then into a standard space (Montreal Neurological Institute); this process included  
241 tri-linear interpolation of voxel sizes to 2x2x2 mm.

242 The resting state functional data used were pre-processed and analysed  
243 using the FMRI Expert Analysis Tool (FEAT). The individual subject analysis  
244 involved: motion correction using MCFLIRT; slice-timing correction using Fourier  
245 space time-series phase-shifting; spatial smoothing using a Gaussian kernel of  
246 FWHM 6mm; grand-mean intensity normalisation of the entire 4D dataset by a  
247 single multiplicative factor; high-pass temporal filtering (Gaussian-weighted  
248 least-squares straight line fitting, with sigma = 100 s); Gaussian low-pass temporal  
249 filtering, with sigma = 2.8s

250

## 251 2.6 Task based fMRI

252 For our task-based analysis, the time points of interest were the probe  
253 trials where participants had to make a decision about something present (0-  
254 back) or absent (1-back) from the screen. We therefore used a box-car regressor  
255 to model the probe trial for each condition and another one to model the entire  
256 block. Modelling the entire block ensured any effect detected from our analysis  
257 can be attributed to the probe itself and not the general effect of the block. Box-car  
258 regressors for each probe/block, for each condition, for each run, were convolved  
259 with a double gamma hemodynamic response function. Regressors of no interest  
260 were included to account for head motion. We computed four contrasts: (1) 0-back  
261 > 1-back, (2) 1-back > 0-back, (3) Object > Colour and (4) Colour > Object. A fixed  
262 effect design (FLAME, <http://www.fmrib.ox.ac.uk/fsl>) was conducted to average  
263 the four runs, within each individual. Individual participant data were then  
264 entered into a higher-level group analysis using a mixed effects design (FLAME,  
265 <http://www.fmrib.ox.ac.uk/fsl>) whole-brain analysis. Finally, our analysis  
266 focused on a conjunction of 1-back > 0-back and Object > Colour to identify regions  
267 engaged in both stimulus independent processing and conceptually abstract  
268 representations.

269

## 270 2.7 Resting-state fMRI

271 We extracted the time series from regions identified by univariate analysis  
272 and used these as explanatory variables in a connectivity analyses at the single

273 subject level. In each analysis, we entered 11 nuisance regressors; the top five  
274 principal components extracted from white matter (WM) and cerebrospinal fluid  
275 (CSF) masks based on the CompCor method (Behzadi, Restom, Liao, & Liu, 2007),  
276 six head motion parameters and spatial smoothing (Gaussian) was applied at  
277 6mm (FWHM). WM and CSF masks were generated from each individual's  
278 structural image (Zhang, Brady, & Smith, 2001). No global signal regression was  
279 performed, following the method implemented in Murphy, Birn, Handwerker,  
280 Jones, & Bandettini (2009).

281 All whole brain analyses were cluster corrected using a z-statistic  
282 threshold of 3.1 to define contiguous clusters. Multiple comparisons were  
283 controlled using Gaussian Random Field Theory at a threshold of  $p < .05$  [34]. All  
284 statistical maps produced in these analyses are freely available at Neurosynth at  
285 the following URL: <http://neurovault.org/collections/2296/>.

286

### 287 3. Results

288 Table 1 presents behavioural performance, in the form of response  
289 efficiency (RT/ACC), for each of the four conditions of our task. Response  
290 efficiency controls for speed-accuracy trade-offs. These data were compared using  
291 a 2 (task; 0-back vs. 1-back) by 2 (condition; object vs. colour) repeated-measures  
292 analysis of variance (ANOVA). There was no significant differences between  
293 stimulus type ( $F(1,28) = 2.55, p = .116$ ) but a significant main effect of task  
294 ( $F(1,28) = 15.38, p < .001$ ). There was no significant interaction ( $p > .05$ ). These  
295 analyses demonstrate that performance on the 1-back task was less efficient than  
296 for the 0-back task but that object and colour conditions were well matched in  
297 terms of overall task difficulty.

298 Table 1. Behavioural results.

| Condition     | Response Efficiency |     |
|---------------|---------------------|-----|
|               | Mean                | SE  |
| Colour 1-back | 1028                | 206 |
| Colour 0-back | 829                 | 287 |
| Object 1-back | 1041                | 229 |
| Object 0-back | 841                 | 295 |

299 Footnote: SE = standard error. Response efficiency = reaction time in milliseconds / percent  
300 accuracy.

301 We next generated statistical maps describing patterns of neural activity at  
302 the moments when participants responded in each of our four conditions. These  
303 maps were compared at the group level using a GLM (see Methods). The contrast  
304 of 0-back > 1-back decisions captures perceptually-guided decision-making,  
305 revealing increased activity in the bilateral ventral visual stream, from occipital  
306 pole through to posterior fusiform cortex (presented in cool colours in the upper  
307 panel of Figure 2). These regions have a well-documented role in online visual  
308 processing. The contrast of 1-back > 0-back reflects stimulus independence in  
309 decision-making. This comparison revealed greater activation in bilateral angular  
310 gyrus and anterior temporal lobes, as well as medial structures in the posterior  
311 cingulate cortex and medial prefrontal cortex (these are presented in warm  
312 colours in the middle panel of Figure 2). Many of these regions fall within the DMN  
313 (58.44% of voxels fell within the DMN as defined by Yeo et al., 2011) and are  
314 spatially similar to the ‘general recollection network’ proposed by Rugg and  
315 Vilburg (2013). The comparison of Objects > Colours identifies brain areas that  
316 support the processing of multi-featural conceptual representations. These are  
317 presented in warm colours in the lower panel in Figure 2. This contrast revealed  
318 a similar set of regions to the stimulus independence contrast (medial pre frontal  
319 cortex, left and right angular gyrus and anterior temporal lobe) with the addition  
320 of the right dorsolateral cortex (52.49 % of voxels fell within the DMN as defined  
321 by Yeo et al., 2011). The contrast of Colours > Objects yielded no significant whole-  
322 brain corrected results. To allow comparison with previous research, the spatial  
323 maps for the contrast of 1-back > 0-back from Konishi and colleagues are also

324 displayed: similarities can be seen in posterior cingulate cortex, medial prefrontal  
325 cortex, right angular gyrus and dorsolateral cortex.

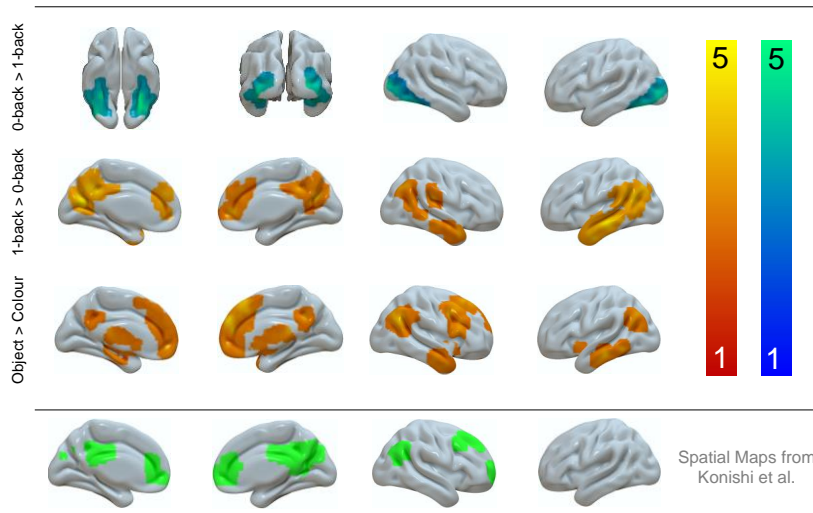

326  
327 **Figure 2.** *Neural activity produced when making decisions based on meaningful*  
328 *objects and when decisions are made from memory.* (a) Activity elicited when  
329 decisions were made based using information from perception (b) Activity when  
330 decisions were made on the basis of information from memory and (c) when  
331 information from memory was more complex. Spatial maps were cluster  
332 corrected at  $Z = 3.1$  FWE.

333

334 Our next analysis formally identifies regions that show a response to both  
335 stimulus independence and memory complexity. Figure 3 shows the results of a  
336 formal conjunction of the contrasts of Object > Colour and 1-back > 0-back,  
337 revealing three regions – bilateral angular gyrus and lateral medial temporal gyrus  
338 in the left hemisphere. The left hand panel of Figure 3 summarizes the parameter  
339 estimates from each of these regions in each condition of our task. In every case  
340 the strongest response was when decisions were made in the Object 1-back  
341 condition. Importantly, although these regions fell within the DMN (88.07% of  
342 voxels within the conjunction mask fell within the DMN as defined by Yeo et al.,  
343 2011), their response profile indicated greater responding during a demanding

344 condition (i.e. Object 1-back) ruling out a task-negative interpretation of these  
345 results.

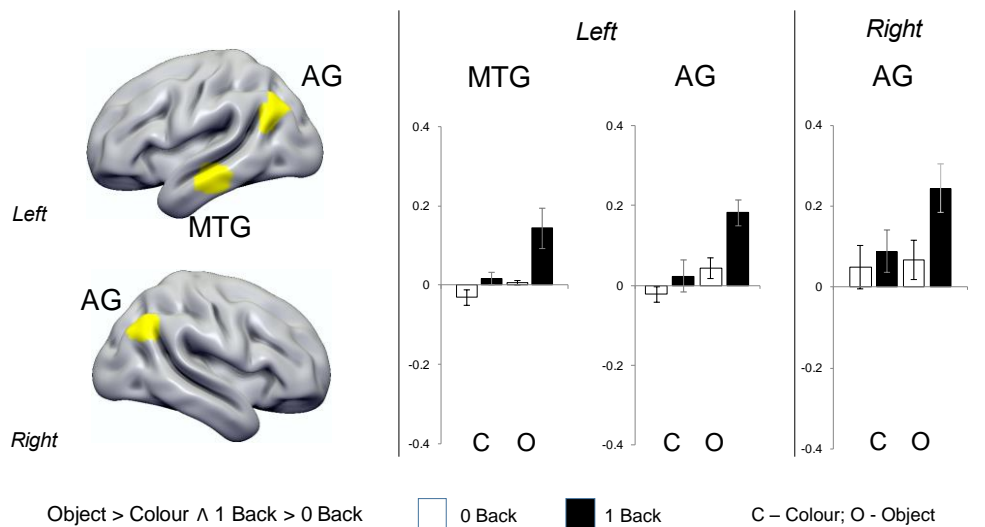

346  
347 **Figure 3.** *Locating peak activity during stimulus independent decisions regarding*  
348 *complex objects.* (a) A conjunction of the neural activity when making decisions  
349 based on meaningful categories and when decisions are made in the absence of  
350 perceptual input revealed three regions: bilateral angular gyrus and in the left  
351 middle temporal gyrus. (b) Percent signal extracted from these regions confirmed  
352 an additive effect (i.e. these regions responded significantly more to the object  
353 condition when information was not present on the screen compared to all other  
354 conditions). The conjunction analysis was based on whole-brain cluster corrected  
355 spatial maps from Figure 2. Error bars indicated 95% confidence intervals.

356

357 We also explored the intrinsic architecture of conjunction regions  
358 responding to Object > Colour and 1-back > 0-back in an independent resting-state  
359 data set (see Methods). The results of this analysis are presented in Figure 4 and  
360 reveal coupling beyond the seed regions to the posterior cingulate cortex,  
361 dorsolateral prefrontal cortex and pre-supplementary motor area bilaterally.  
362 Some of these regions fall outside the DMN, as defined by Yeo and colleagues, and

363 instead are members of the frontoparietal network linked with cognitive control  
364 (Yeo et al., 2011).  
365

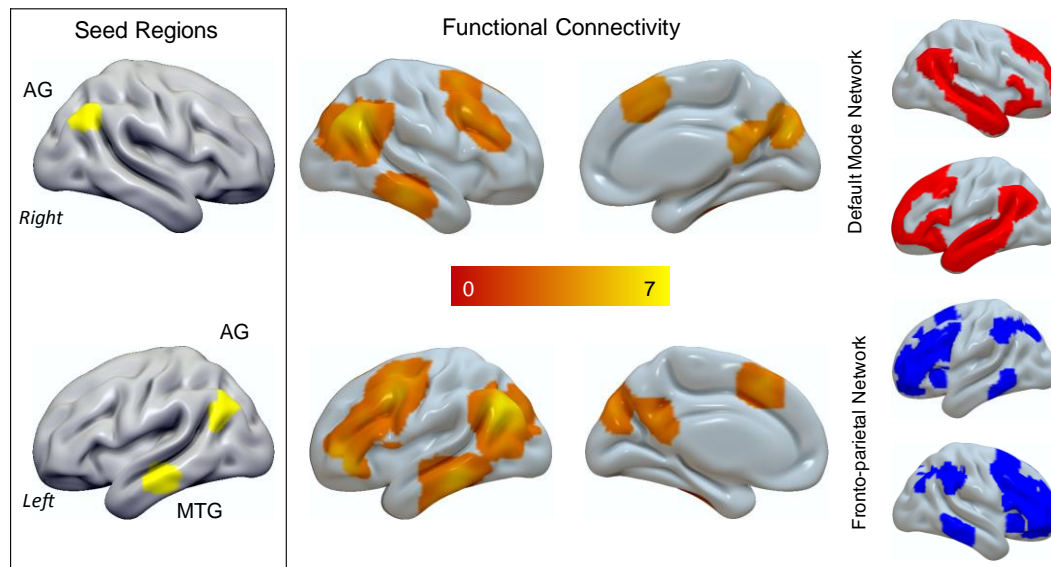

366  
367 **Figure 4.** Peak areas during stimulus independent decision regarding  
368 complex stimuli involve both regions of the default mode network (DMN) and the  
369 fronto-parietal network (FPN). These regions show functional connectivity at rest  
370 with both the pre-supplementary cortex and the dorsolateral pre-frontal cortex.  
371 Although the regions identified in our conjunction analysis fall within the DMN  
372 they show functional communication with regions in the FPN, including the right  
373 dorsolateral prefrontal cortex. The spatial networks in the grey panel are from the  
374 decomposition of Yeo and colleagues. The conjunction analysis was based on  
375 whole-brain cluster corrected spatial maps from Figure 1. For the connectivity  
376 analyses spatial maps were cluster corrected at  $Z = 3.1$  FWE.

377  
378 We also conducted a supplementary analysis contrasting Object and Colour  
379 decisions separately in the 1-back and 0-back conditions to confirm regions  
380 important for stimulus-independent decisions (see Supplementary Figure 1). This  
381 analysis showed that 1-back trials involving meaningful objects activated regions  
382 including angular gyrus, middle temporal gyrus and right dorsolateral prefrontal

383 regions more than colours. In contrast, the comparison of Objects > Colours in the  
384 0-back condition only revealed greater activity in fusiform cortex.

385

386 Together these analyses highlight a network of regions that are important  
387 when spatial decisions are made in the absence of external sensory support, and  
388 when they involve multi-feature concepts (Figure 5). Common regions responding  
389 to the two task contrasts (1-back > 0-back; Object > Colour), include angular gyrus  
390 and middle temporal gyrus. In the right hemisphere, two of the three maps also  
391 include the right dorsolateral cortex. All of these right hemisphere regions  
392 responded to a similar 1-back > 0-back contrast involving abstract shapes (circle,  
393 triangle, square) in the study by Konishi and colleagues (2015).

394

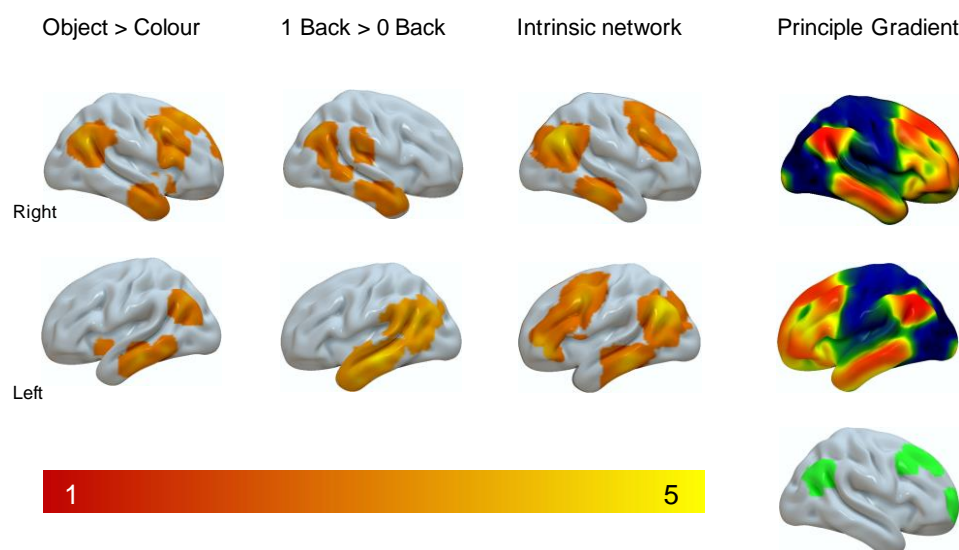

395

396 **Figure 5.** *Regions linked to during stimulus independent decisions regarding*  
397 *complex stimuli form localized clusters in transmodal cortex.* Regions in the main  
398 panel reflect data generated in this experiment. The grey sub panel presents the  
399 spatial distribution of the principle gradient from Margulies and colleagues (2016)  
400 coloured blue-red, and the cluster corrected map from Konishi and colleagues  
401 (2015) coloured green.

402

403 In Figure 5, we summarise the spatial maps produced by this experiment  
404 and present these alongside the principal gradient from Margulies and colleagues  
405 (2016), which describes a functional spectrum of intrinsic connectivity across the  
406 cortical surface, extending from primary sensorimotor systems to regions of the



407 DMN at the other extreme. More similar colours on this gradient reflect greater  
408 similarity in connectivity. It can be seen that common regions implicated in  
409 stimulus-independent and conceptual processing are all localized towards the  
410 transmodal end of the principal gradient.

411

412 Our final analysis characterizes the similarity between the neural patterns  
413 captured by our task and the spatial distribution of the principle gradient from  
414 Margulies et al., (2016) in a more formal manner. Following Margulies et al., we  
415 divided the principle gradient into 20 equally sized bins. Next for each participant  
416 we calculated the average signal in each bin for each condition of our task. The left  
417 hand panel in Figure 6 presents these data plotted across the principle gradient  
418 separately for each condition; the shaded bars represent the 95% confidence  
419 intervals. It can be see that the conditions are most distinct towards the  
420 transmodal end, with the highest values when participants made judgments about  
421 objects from memory. To quantify these patterns, we compared their distribution  
422 using a 2 (stimulus independence) X (stimulus complexity) X 20 (Gradient Bin)  
423 ANOVA. This revealed a significant 3-way interaction [ $F(19, 532) = 5.136, p <$   
424  $.001$ ]. To follow up this interaction, we performed a principle components analysis  
425 (PCA) on the condition level data, describing the dynamics captured in the left  
426 hand panel of Figure 6. The results revealed two components with eigenvalues  
427 greater than 1 accounting for over 86% of the variance (component 1 = 70.49%;  
428 component 2 = 15.73%) across the principal gradient bins. The first two  
429 components are presented in the right hand panel of Figure 6. The second  
430 component describes a gradual transition showing increasing levels of BOLD  
431 activity from the unimodal end of the gradient towards the transmodal end.  
432 Projecting the values from component 2 back onto the task conditions, and  
433 averaging them at the group-level, revealed that this pattern of variance loaded  
434 almost exclusively on the 'object' 1-back condition. There was a significant

435 positive fit between the spatial map of the principle gradient and recruitment in  
436 the Object 1-Back task, but not other conditions.  
437

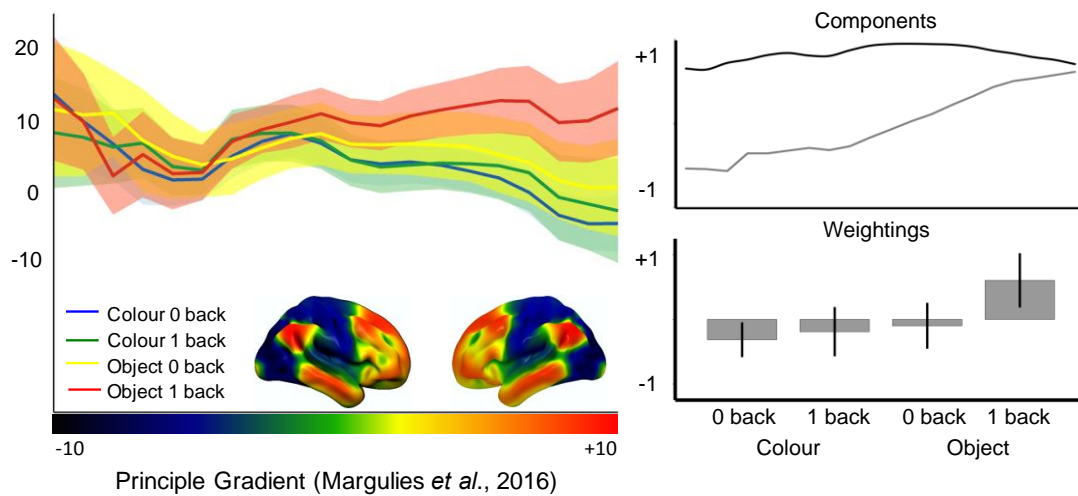

438  
439 **Figure 6.** *Stimulus independent decisions regarding meaningful objects*  
440 *leads to a whole-brain shift towards the transmodal-end of the gradient.* (a) A  
441 regions-of-interest analysis using bins of the principal gradient revealed that the  
442 decisions that are made on objects rather than colours when these stimuli are not  
443 available to perception led to higher activity towards the transmodal-end of the  
444 principal gradient. (b) Decomposition using PCA revealed that this difference was  
445 related to a gradual shift in the locus of neural activity away from regions on the  
446 principal gradient related to perception and action and towards transmodal  
447 regions of cortex. Error bars indicated 95% confidence interval.

448

#### 449 4. Discussion

450 Our experiment contrasted judgments when stimuli to be decided upon  
451 were present in the current trial (stimulus-dependent 0-back decisions) with  
452 identical decisions where the information was from the previous trial (stimulus-  
453 independent 1-back decisions, see Figure 1). We also varied whether decisions  
454 were made on uni-dimensional stimuli (colour patches) or more complex multi-  
455 dimensional stimuli (objects in conceptual categories). In each task, the items to  
456 be matched were not perceptually identical: participants selected the closest hue  
457 or the closest concept from similar distractors. This allowed us to identify regions  
458 that capture cognitive processes important for representing (i) information that

459 is decoupled from stimulus input, (ii) representations that are complex and multi-  
460 dimensional in nature and (iii) a combination of both.

461 Using conventional whole brain analyses we identified overlapping regions  
462 in the DMN that are sensitive to both perceptual decoupling (i.e., the requirement  
463 to make decisions based on memory, as opposed to the immediate environment)  
464 and when these decisions regarded more complex conceptual categories of stimuli  
465 (i.e., decisions based on objects rather than colours). We also used a novel analytic  
466 approach to demonstrate that these isolated clusters of activity can be seen as part  
467 of a whole brain shift in the locus of neural activity towards the extreme end of a  
468 gradient from unimodal to heteromodal cortex (Margulies et al., 2016). These  
469 findings have broad implications for the role of DMN in cognition, and also  
470 contribute to our understanding of specific DMN regions, particularly angular  
471 gyrus and lateral temporal lobe. We first consider the results in terms of their  
472 implications for functional accounts of these regions. Secondly, we consider the  
473 macroscale organisation of the cortex, focusing on approaches which can explain  
474 the functional similarity of these distributed clusters and their relative position on  
475 the cortical surface.

476 Functional implications for the angular gyri: There were stronger  
477 responses in left and right angular gyri, as well as in left middle temporal gyrus,  
478 when conceptual decisions were based on information that was no longer present  
479 in the environment. These findings are inconsistent with several existing accounts  
480 of the contribution of angular gyrus to memory and semantic cognition. First, they  
481 do not easily align with the proposal that specific aspects of meaning are  
482 represented in angular gyrus – namely thematic associations, but not item identity  
483 (Davey et al., 2015; Schwartz et al., 2011). Our conceptual task involved matching  
484 items on the basis of their identity, yet it robustly activated this region. Secondly,  
485 the findings are at odds with the proposal that the angular gyri only activate  
486 during contrasts of easier versus harder tasks, and for “automatic” and not  
487 “controlled” patterns of retrieval (Humphreys et al., 2015; Humphreys & Lambon  
488 Ralph, 2017). The 1-back condition was harder than the 0-back condition and still  
489 elicited a greater response.

490 Instead, our findings are consistent with suggestions that the role of the  
491 angular gyri role is to allocate attention to complex memory representations. The

492 angular gyri show a stronger response to a range of memory retrieval situations  
493 in which the retrieved representations are detailed, specific or precise (Binder et  
494 al., 2005; Price, et al., 2015; Bonnici et al., 2016; Davey et al., 2015). In our study,  
495 the 1-back trials required attention to switch from an encoding mode, to a  
496 retrieval mode when task relevant information is represented internally. This  
497 pattern of responding in the angular gyrus is consistent with the purported role of  
498 inferior parietal cortex in focusing attention on memory (Cabeza et al., 2011). In  
499 our study, the angular gyri did not activate to the same extent when stimuli were  
500 matched on colour, suggesting this region is especially important when  
501 heteromodal representations from long-term memory are retrieved.

502 Functional implications for temporal cortex: Angular gyrus shows strong  
503 intrinsic connectivity with ventral anterior temporal cortex (Davey et al., 2016;  
504 Jackson et al., 2016), which is proposed to support the integration of multiple  
505 features and modalities to capture ‘deep’ conceptual similarities between items  
506 with diverse ‘surface’ features (e.g., items such as PINEAPPLE and KIWI that have  
507 different colours, sizes, shapes, phonology etc.; for a review see Lambon (Ralph et  
508 al., 2017). Semantic dementia patients with atrophy focussed on this region show  
509 highly consistent degradation of conceptual knowledge across tasks (Bozeat et al.,  
510 2000; Jefferies & Lambon Ralph, 2006), while neuroimaging studies of healthy  
511 participants localise the response during heteromodal conceptual processing to  
512 ventral anterior temporal lobes and anterior middle temporal gyrus (Murphy et  
513 al., 2017; Visser et al., 2011). Word meaning can be decoded within anterior  
514 middle and inferior temporal gyri, while patterns of activation in superior  
515 temporal gyrus instead reflect the presentation format (Murphy et al., 2017).

516 The ventral anterior temporal lobes are thought to provide a “graded hub”  
517 in which different unimodal features are gradually integrated to form  
518 heteromodal concepts, with visual information reaching this region along the  
519 ventral visual pathway (fusiform cortex), auditory and motor information arriving  
520 from superior temporal gyrus and frontal cortex, and social/emotional  
521 information merging from the temporal pole (Lambon Ralph et al., 2017).  
522 Nevertheless, the peak response in the anterior temporal lobes in the current  
523 study was in lateral MTG, and not in the site of the putative hub in ventral anterior  
524 temporal cortex (Murphy et al., 2017). Visser et al. (2012) observed evidence

525 compatible with two gradients of information convergence in the temporal lobes:  
526 first, there is a posterior-to-anterior axis: posterior temporal lobe regions  
527 proximal to visual and auditory cortex show largely unimodal responses, while  
528 more anterior regions integrate across these types of input to support  
529 heteromodal conceptual processing. Secondly, there may be integration from  
530 superior and inferior regions, implicated in auditory and visual processing  
531 respectively: towards middle temporal gyrus response become more heteromodal  
532 response along the length of the temporal cortex. The site we observed in the  
533 conjunction of semantic and perceptually-decoupled decisions in the current  
534 study corresponds to the extreme heteromodal end of *both* of these temporal lobe  
535 gradients.

536 Implications for the default mode network: We replicated prior  
537 demonstrations that transmodal regions in the DMN are engaged when  
538 participants make decisions that rely on information from memory rather than  
539 input from perception, even though the 1-back task was more difficult than the 0-  
540 back task (Konishi et al., 2015). This pattern of task-positive behaviour adds to a  
541 growing body of evidence that the DMN contributes in an active manner to  
542 demanding external cognitive tasks (Konishi et al., 2015; Krieger-Redwood et al.,  
543 2016; Spreng et al., 2014; Spreng et al., 2015; Spreng et al., 2010; Vatansever et al.,  
544 2015). The contribution of DMN to controlled cognitive states appears to reflect  
545 situations in which DMN regions work in tandem with the frontoparietal network.  
546 Prior work has established the combination of these networks is important for  
547 tasks including controlled semantic retrieval (Krieger-Redwood et al., 2016),  
548 working memory (Vatansever et al., 2015), autobiographical planning (Spreng et  
549 al., 2014; Spreng et al., 2015), retrieving memories of close personal friends (de  
550 Caso et al., 2017) and the control of spontaneous thoughts in a deliberate manner  
551 (Golchert et al., 2017). Our study shows that right angular gyrus, within the DMN,  
552 and right dorsolateral prefrontal cortex, a member of the frontoparietal network,  
553 activate together when participants make judgments about meaningful objects  
554 from memory rather than colours (see Supplementary Figure 1). Our functional  
555 connectivity analysis also demonstrates that these regions are correlated at rest,  
556 suggesting they form an intrinsic network. The right dorsolateral cluster  
557 replicates the spatial distribution observed from the prior study by Konishi et al.

558 (Konishi et al., 2015) and overlaps with a region of greater grey matter associated  
559 with more deliberate mind-wandering (Golchert et al., 2017). Both 1-back  
560 retrieval in our paradigm, and more deliberate spontaneous thought, require  
561 memory retrieval to be shaped in a goal-directed fashion. It is possible that a range  
562 of states requiring the goal-directed control of memory depend on co-operation  
563 between these two large-scale networks.

564 At the most general level our study supports the hypothesis that the  
565 capacity for complex memory representations to influence cognition emerges  
566 from the topographical arrangement of neural processes across the cortex. Prior  
567 work highlighted regions of transmodal cortex, such as the default mode network,  
568 as having the greatest distance from uni-modal sensorimotor cortex in both  
569 functional and structural space (Margulies et al., 2016). Our finding builds on this  
570 observation by showing an association between ongoing neural activity and this  
571 dimension of connectivity under situations when the demands placed on cognition  
572 require a combination of memory complexity and stimulus independency. Using  
573 both standard and novel methods of analysis, we demonstrated that the neural  
574 activity associated with this type of activity is prevalent in transmodal regions  
575 (Figure 5) and can be represented as a whole brain shift in the balance of neural  
576 activity, away from sensorimotor regions cortex and towards the transmodal end  
577 of the gradient (Figure 6). This topographical shift in the distribution of neural  
578 processing is consistent with theoretical accounts that assume that more abstract  
579 cortical functions are facilitated through functional isolation from incoming input  
580 (Buckner & Krienen, 2013; Margulies et al., 2016; Mesulam, 1998; Smallwood,  
581 2013). Consistent with this interpretation of DMN function, a recent study found  
582 that strong connectivity within the DMN (including an overlapping region of left  
583 temporal cortex) was linked to poor performance on tasks which depend on  
584 encoding information from the environment but not for those that depended on  
585 retrieving information from memory (Poerio et al., 2017). The findings of Poerio  
586 and colleagues, in combination with those from the current study, provide  
587 converging evidence that regions of the DMN support a state where cognition is  
588 guided by memory rather than input, regardless of whether it is beneficial to the  
589 task or not.

590           There are a number of limitations that should be borne in mind when  
591 considering the results of this study. First, our comparison of semantic and colour  
592 decisions allowed us to demonstrate a neural pattern associating conceptual  
593 processing with stimulus independency. This comparison is too crude a  
594 manipulation to determine which aspects of the semantic judgements gave rise to  
595 this response in the DMN; for example, is it the richness of concepts such as  
596 Labrador or apple, their heteromodal nature or the fact that they are acquired over  
597 a lifetime, which dissociates them from colours? Future studies could probe  
598 different features of retrieval, such as whether the target is a concrete or abstract  
599 concept, whether it has to be identified at a specific or superordinate level, and  
600 whether there are differences according to the modality of the representation  
601 being probed. Second, the nature of our design precludes the ability to separate  
602 different aspects of memory retrieval engaged during 1-back decisions. In our  
603 paradigm, these decisions require both the integration of appropriate information  
604 from memory, as well as the inhibition of the memory representation for the non-  
605 probed item. Interestingly, studies have implicated dorsolateral prefrontal cortex  
606 in the suppression of memories (Anderson et al., 2004) whereas the angular gyrus  
607 has been linked to the integration of appropriate semantic features (Wagner et al.,  
608 2015) and the retrieval of specific information (Davey et al., 2015). It is possible  
609 that the angular gyrus and dorsolateral prefrontal region are performing distinct  
610 roles in integration of relevant associations and suppression of irrelevant  
611 information during retrieval in our paradigm. Future work could address this  
612 question by manipulating the level of featural overlap between target and probe  
613 during retrieval in a similar paradigm as in this experiment.

614

615 Funding:

616 The research was supported by BBSRC grant BB/J006963/1. EJ was supported  
617 by a grant from the European Research Council (SEMBIND - 283530). JS was  
618 supported by a grant from the European Research Council (Wandering Minds –  
619 303701).

## 620 **References**

- 621 Anderson, M. C., Ochsner, K. N., Kuhl, B., Cooper, J., Robertson, E., Gabrieli, S. W., . . .  
622 . Gabrieli, J. D. (2004). Neural systems underlying the suppression of  
623 unwanted memories. *Science*, *303*(5655), 232-235.  
624 doi:10.1126/science.1089504
- 625 Behzadi, Y., Restom, K., Liau, J., & Liu, T. T. (2007). A component based noise  
626 correction method (CompCor) for BOLD and perfusion based fMRI.  
627 *Neuroimage*, *37*(1), 90-101. doi:10.1016/j.neuroimage.2007.04.042
- 628 Binder, J. R., Desai, R. H., Graves, W. W., & Conant, L. L. (2009). Where is the  
629 semantic system? A critical review and meta-analysis of 120 functional  
630 neuroimaging studies. *Cereb Cortex*, *19*(12), 2767-2796.  
631 doi:10.1093/cercor/bhp055
- 632 Bonnici, H. M., Richter, F. R., Yazar, Y., & Simons, J. S. (2016). Multimodal Feature  
633 Integration in the Angular Gyrus during Episodic and Semantic Retrieval. *J*  
634 *Neurosci*, *36*(20), 5462-5471. doi:10.1523/JNEUROSCI.4310-15.2016
- 635 Buckner, R. L., & Krienen, F. M. (2013). The evolution of distributed association  
636 networks in the human brain. *Trends Cogn Sci*, *17*(12), 648-665.  
637 doi:10.1016/j.tics.2013.09.017
- 638 Cabeza, R., Mazuz, Y. S., Stokes, J., Kragel, J. E., Woldorff, M. G., Ciaramelli, E., . . .  
639 Moscovitch, M. (2011). Overlapping parietal activity in memory and  
640 perception: evidence for the attention to memory model. *J Cogn Neurosci*,  
641 *23*(11), 3209-3217. doi:10.1162/jocn\_a\_00065
- 642 Davey, J., Cornelissen, P. L., Thompson, H. E., Sonkusare, S., Hallam, G., Smallwood,  
643 J., & Jefferies, E. (2015). Automatic and Controlled Semantic Retrieval: TMS  
644 Reveals Distinct Contributions of Posterior Middle Temporal Gyrus and  
645 Angular Gyrus. *J Neurosci*, *35*(46), 15230-15239.  
646 doi:10.1523/JNEUROSCI.4705-14.2015
- 647 de Caso, I., Karapanagiotidis, T., Aggius-Vella, E., Konishi, M., Margulies, D. S.,  
648 Jefferies, E., & Smallwood, J. (2017). Knowing me, knowing you: Resting-  
649 state functional connectivity of ventromedial prefrontal cortex dissociates  
650 memory related to self from a familiar other. *Brain Cogn*, *113*, 65-75.  
651 doi:10.1016/j.bandc.2017.01.004
- 652 Engen, H. G., Kanske, P., & Singer, T. (2017). The neural component-process  
653 architecture of endogenously generated emotion. *Soc Cogn Affect Neurosci*,  
654 *12*(2), 197-211. doi:10.1093/scan/nsw108
- 655 Golchert, J., Smallwood, J., Jefferies, E., Seli, P., Huntenburg, J. M., Liem, F., . . .  
656 Margulies, D. S. (2017). Individual variation in intentionality in the mind-  
657 wandering state is reflected in the integration of the default-mode, fronto-  
658 parietal, and limbic networks. *Neuroimage*, *146*, 226-235.  
659 doi:10.1016/j.neuroimage.2016.11.025
- 660 Gusnard, D. A., Akbudak, E., Shulman, G. L., & Raichle, M. E. (2001). Medial  
661 prefrontal cortex and self-referential mental activity: relation to a default  
662 mode of brain function. *Proc Natl Acad Sci U S A*, *98*(7), 4259-4264.  
663 doi:10.1073/pnas.071043098
- 664 Jenkinson, M., Bannister, P., Brady, M., & Smith, S. (2002). Improved optimization  
665 for the robust and accurate linear registration and motion correction of  
666 brain images. *Neuroimage*, *17*(2), 825-841.
- 667 Konishi, M., McLaren, D. G., Engen, H., & Smallwood, J. (2015). Shaped by the Past:  
668 The Default Mode Network Supports Cognition that Is Independent of



- 669 Immediate Perceptual Input. *PLoS One*, 10(6), e0132209.  
670 doi:10.1371/journal.pone.0132209
- 671 Krieger-Redwood, K., Jefferies, E., Karapanagiotidis, T., Seymour, R., Nunes, A., Ang,  
672 J. W., . . . Smallwood, J. (2016). Down but not out in posterior cingulate  
673 cortex: Deactivation yet functional coupling with prefrontal cortex during  
674 demanding semantic cognition. *Neuroimage*, 141, 366-377.  
675 doi:10.1016/j.neuroimage.2016.07.060
- 676 Leech, R., Braga, R., & Sharp, D. J. (2012). Echoes of the brain within the posterior  
677 cingulate cortex. *J Neurosci*, 32(1), 215-222.  
678 doi:10.1523/JNEUROSCI.3689-11.2012
- 679 Leech, R., & Sharp, D. J. (2014). The role of the posterior cingulate cortex in  
680 cognition and disease. *Brain*, 137(Pt 1), 12-32. doi:10.1093/brain/awt162
- 681 Margulies, D. S., Ghosh, S. S., Goulas, A., Falkiewicz, M., Huntenburg, J. M., Langs, G.,  
682 . . . Smallwood, J. (2016). Situating the default-mode network along a  
683 principal gradient of macroscale cortical organization. *Proc Natl Acad Sci U*  
684 *SA*, 113(44), 12574-12579. doi:10.1073/pnas.1608282113
- 685 Mesulam, M. M. (1998). From sensation to cognition. *Brain*, 121 (Pt 6), 1013-1052.
- 686 Moscovitch, M., Cabeza, R., Winocur, G., & Nadel, L. (2016). Episodic Memory and  
687 Beyond: The Hippocampus and Neocortex in Transformation. *Annu Rev*  
688 *Psychol*, 67, 105-134. doi:10.1146/annurev-psych-113011-143733
- 689 Ralph, M. A., Jefferies, E., Patterson, K., & Rogers, T. T. (2017). The neural and  
690 computational bases of semantic cognition. *Nat Rev Neurosci*, 18(1), 42-55.  
691 doi:10.1038/nrn.2016.150
- 692 Rugg, M. D., & Vilberg, K. L. (2013). Brain networks underlying episodic memory  
693 retrieval. *Curr Opin Neurobiol*, 23(2), 255-260.  
694 doi:10.1016/j.conb.2012.11.005
- 695 Schacter, D. L., & Addis, D. R. (2007). The cognitive neuroscience of constructive  
696 memory: remembering the past and imagining the future. *Philos Trans R*  
697 *Soc Lond B Biol Sci*, 362(1481), 773-786. doi:10.1098/rstb.2007.2087
- 698 Seghier, M. L. (2013). The angular gyrus: multiple functions and multiple  
699 subdivisions. *Neuroscientist*, 19(1), 43-61.  
700 doi:10.1177/1073858412440596
- 701 Smallwood, J. (2013). Distinguishing how from why the mind wanders: a process-  
702 occurrence framework for self-generated mental activity. *Psychol Bull*,  
703 139(3), 519-535. doi:10.1037/a0030010
- 704 Smith, S. M. (2002). Fast robust automated brain extraction. *Hum Brain Mapp*,  
705 17(3), 143-155. doi:10.1002/hbm.10062
- 706 Spreng, R. N. (2012). The fallacy of a "task-negative" network. *Front Psychol*, 3,  
707 145. doi:10.3389/fpsyg.2012.00145
- 708 Spreng, R. N., DuPre, E., Selarka, D., Garcia, J., Gojkovic, S., Mildner, J., . . . Turner, G.  
709 R. (2014). Goal-congruent default network activity facilitates cognitive  
710 control. *J Neurosci*, 34(42), 14108-14114. doi:10.1523/JNEUROSCI.2815-  
711 14.2014
- 712 Spreng, R. N., Gerlach, K. D., Turner, G. R., & Schacter, D. L. (2015).  
713 Autobiographical Planning and the Brain: Activation and Its Modulation by  
714 Qualitative Features. *J Cogn Neurosci*, 27(11), 2147-2157.  
715 doi:10.1162/jocn\_a\_00846
- 716 Spreng, R. N., Stevens, W. D., Chamberlain, J. P., Gilmore, A. W., & Schacter, D. L.  
717 (2010). Default network activity, coupled with the frontoparietal control

- 718 network, supports goal-directed cognition. *Neuroimage*, 53(1), 303-317.  
719 doi:10.1016/j.neuroimage.2010.06.016
- 720 Vatansever, D., Menon, D. K., Manktelow, A. E., Sahakian, B. J., & Stamatakis, E. A.  
721 (2015). Default mode network connectivity during task execution.  
722 *Neuroimage*, 122, 96-104. doi:10.1016/j.neuroimage.2015.07.053
- 723 Visser, M., Jefferies, E., & Lambon Ralph, M. A. (2010). Semantic processing in the  
724 anterior temporal lobes: a meta-analysis of the functional neuroimaging  
725 literature. *J Cogn Neurosci*, 22(6), 1083-1094.  
726 doi:10.1162/jocn.2009.21309
- 727 Wagner, I. C., van Buuren, M., Kroes, M. C., Gutteling, T. P., van der Linden, M.,  
728 Morris, R. G., & Fernandez, G. (2015). Schematic memory components  
729 converge within angular gyrus during retrieval. *Elife*, 4, e09668.  
730 doi:10.7554/eLife.09668
- 731 Yeo, B. T., Krienen, F. M., Sepulcre, J., Sabuncu, M. R., Lashkari, D., Hollinshead, M.,  
732 . . . Buckner, R. L. (2011). The organization of the human cerebral cortex  
733 estimated by intrinsic functional connectivity. *J Neurophysiol*, 106(3),  
734 1125-1165. doi:10.1152/jn.00338.2011
- 735 Zhang, Y., Brady, M., & Smith, S. (2001). Segmentation of Brain MR Images Through  
736 a Hidden Markov Random Field Model and the Expectation-Maximization  
737 Algorithm. *IEEE Transactions on Medical Imaging*, 20(1), 45-57.  
738

**Supplementary material**

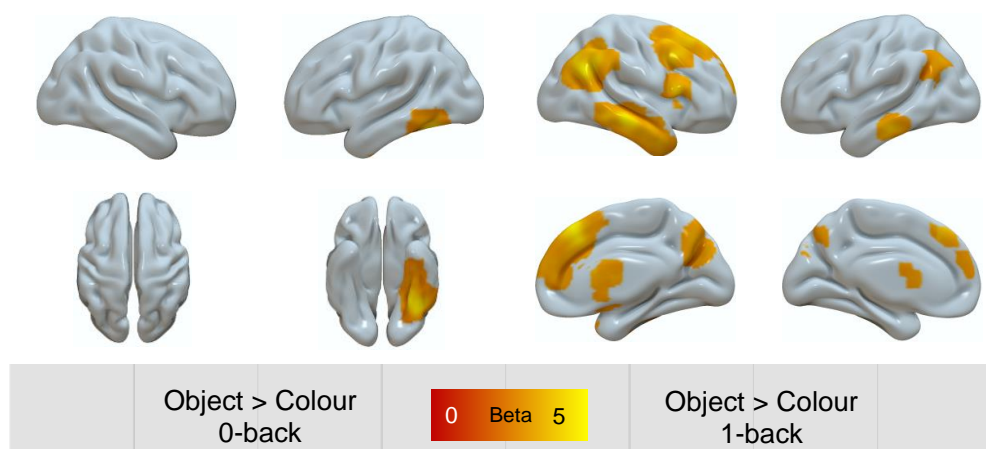

**Figure S1.** Comparison of complex memory representation in the presence or absence of relevant perceptual input. Spatial maps were cluster corrected at  $Z = 3.1$  FWE.
